# Supplementary material for: Discovery of a novel spin-polarized nodal ring in a two-dimensional HK lattice
Source: Royal Society of Chemistry journal article supplement (doi:10.1039/c8nr05383a), 2018-01-01
Supplement: c8nr05383a1.pdf [file c8nr05383a1.pdf]

## Supporting Information

### **Discovery of a novel spin-polarized Nodal ring in two-dimensional HK lattice**

Liang Zhang,<sup>1</sup> Shu-feng Zhang,<sup>1</sup> Wei-xiao Ji,<sup>1</sup> Chang-wen Zhang,<sup>1\*</sup> Ping Li,<sup>1</sup> Pei-ji Wang<sup>1</sup>, Sheng-shi Li,<sup>2</sup> and Shi-shen Yan<sup>2\*</sup>

<sup>1</sup> School of Physics and Technology, University of Jinan, Jinan, Shandong, 250022, People's Republic of China

<sup>2</sup> School of Physics, State Key laboratory of Crystal Materials, Shandong University, Jinan, Shandong 250100, People's Republic of China

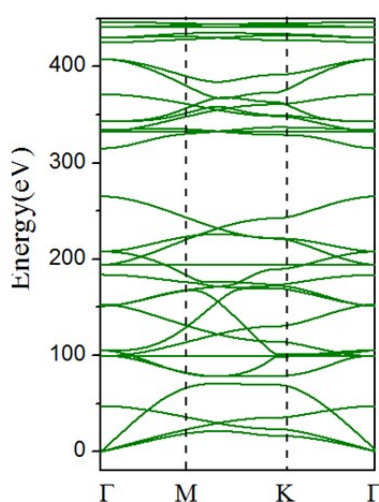

Fig. S1 Calculated phonon band dispersions of Mn-Cyanogen lattice. No appreciable imaginary phonon modes are observed, indicating that the Mn-Cyanogen lattice is kinetically stable.

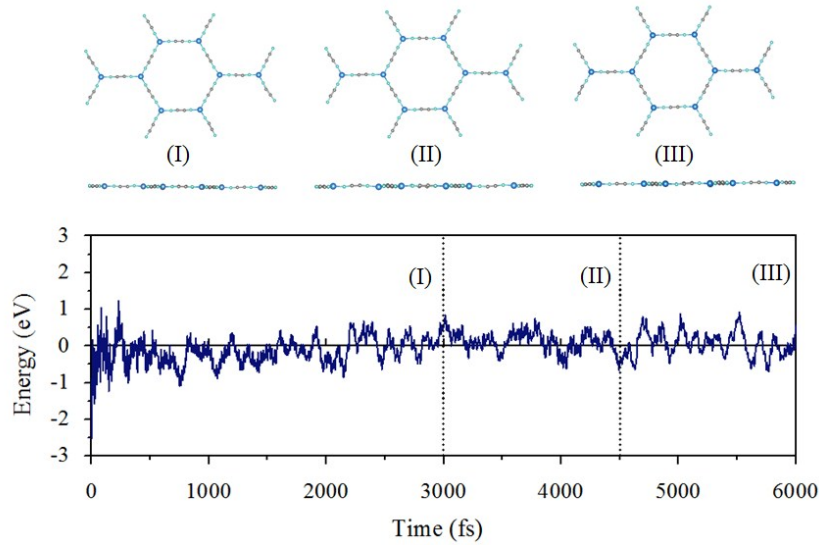

Fig. S2 Snapshot of atomic *configurations* of Mn-Cyanogen lattice at the end of the MD simulation at 3, 3.5 and 6 ps, respectively. Also, the total potential energy fluctuation during MD simulations at 300 K is shown. Note that the structure of the Mn-Cyanogen lattice does not collapse up to 300 K, indicating that the melting point of Mn-Cyanogen lattice is probably at 300 K.

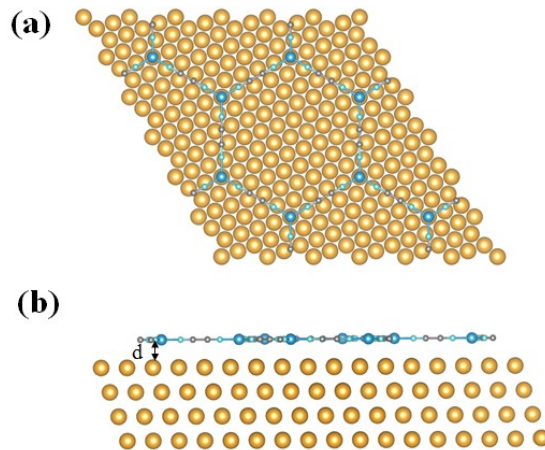

Fig. S3 Epitaxial synthesized Mn-Cyanogen lattice on Au(111) substrate. We find that the calculated adhesion energy between Mn-Cyanogen and Au (111) substrate is - 3.164 eV/atom, which is comparable with those of the experimentally synthesized 2D films, such as silicene and  $\alpha$ - boron on Ag(111) substrate. Therefore, it is expected that the Mn-Cyanogen lattice can be synthesized by the pathway similar to those of other 2D materials on the Ag (111) substrate.

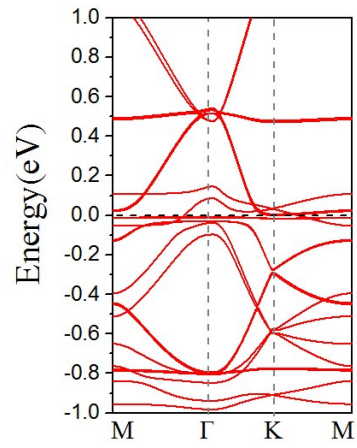

Fig. S4 Calculated band structures of Cyanogen-Mn lattice as the FM ground state has the in-plane spin orientation.
